# Supplementary material for: Evaluation of PCR Systems for Field Screening of Bacillus anthracis
Source: PubMed Central journal article supplement — Health Secur. 2017 Feb 1;15(1):70–80. doi: 10.1089/hs.2016.0043 (PMC5314994; doi:10.1089/hs.2016.0043), 2017-02-01
Supplement: Supp_Data.pdf [file Supp_Data.pdf]

# SUPPLEMENTAL INFORMATION FOR “EVALUATION OF PCR SYSTEMS FOR FIELD SCREENING OF *BACILLUS ANTHRACIS*”

## Inclusivity and Exclusivity DNA and Suspicious Powder Panels for PCR System Testing

The AOAC SMPR 2010.003, “Standard Method Performance Requirements for Polymerase Chain Reaction (PCR) Methods for Detection of *Bacillus anthracis* in Aerosol Collection Filters and/or Liquids”<sup>1</sup> guided the use of inclusivity and exclusivity *Bacillus* strains for DNA-based testing. Our inclusivity DNA panel (Table S1) does not include BA02 or BA14 because these 2 strains lack the pXO2 plasmid, which is the target for the PCR assays that we tested. Our exclusivity DNA panel (Table S2) does not include BANN13 or BANN14 because these strains contain a plasmid homologous to pXO2, which would generate an expected misleading positive result for pXO2. Suspicious powders used for testing are listed in Table S3; these were selected based on AOAC SMPR 2010.004<sup>2</sup> and interviews with first responders.

## Limited Testing for Detection of Ricin Toxin

We evaluated the performance of 5 hand-held PCR instruments for detection of *Bacillus anthracis*, as described in the main body of the paper. Four of these instruments also had commercially available assays for detecting ricin, a protein toxin produced in the seeds of the castor plant *Ricinus communis*.<sup>3</sup> The PCR assays for “ricin” are actually assays to detect *R. communis* DNA. In addition to the statistically

based testing of *B. anthracis* described in the main body of the paper, we performed limited testing of ricin as follows.

## Instruments and Assays

The 4 instruments and assays tested were:

- FilmArray<sup>®</sup>: Biothreat pouch
- RAZOR<sup>®</sup> EX: 10-threat pouch
- T-COR 4<sup>TM</sup>: Ricin assay
- POCKIT<sup>TM</sup>: Ricin assay

Assays were performed according to the manufacturer’s instructions. See the main body of the paper for brief descriptions of the instruments.

## Samples

Pure ricin toxin was obtained from Vector Laboratories (Burlingame, CA). Three crude ricin preparations were extracted from castor seeds and prepared at PNNL as described by Wunschel et al:<sup>4</sup> (1) crushing castor seeds to produce a mash (CM), (2) extracting crushed castor seeds with acetone to remove oil (AE), and (3) precipitating protein from crushed castor seeds with acetone (AP). Following are very brief summaries of each of the ricin preparation methods.

Table S1. *Ba* inclusivity panel, with strain numbers taken from the AOAC inclusivity panel (SMPR 2010.003)<sup>18</sup>

| Strain Number | Genotype | Strain            | Characteristics                       |
|---------------|----------|-------------------|---------------------------------------|
| BA1           | 7        | Canadian bison    | pXO1+, pXO2+, VNTR genotype group A1a |
| BA3           | 29       | PAK-1             | pXO1+, pXO2+, VNTR genotype group A2  |
| BA4           | 51       | BA1015            | pXO1+, pXO2+, VNTR genotype group A3a |
| BA5           | 62       | Ames              | pXO1+, pXO2+, VNTR genotype group A3b |
| BA6           | 67       | K3                | pXO1+, pXO2+, VNTR genotype group A3c |
| BA7           | 68       | Ohio ACB          | pXO1+, pXO2+, VNTR genotype group A3d |
| BA8           | 69       | SK-102 (Pakistan) | pXO1+, pXO2+, VNTR genotype group A4  |
| BA9           | 77       | Vollum 1B         | pXO1+, pXO2+, VNTR genotype group A4  |
| BA10          | 82       | BA1035            | pXO1+, pXO2+, VNTR genotype group B1  |
| BA11          | 80       | RA3               | pXO1+, pXO2+, VNTR genotype group B2  |
| BA12          | NA       | 2002013094 (240)  | pXO1+, pXO2+, VNTR genotype group C   |
| BA13          | 8        | Pasteur           | pXO1-, pXO2+; VNTR genotype group A1a |
| BA15          | 23       | Turkey #32        | pXO1+, pXO2+, VNTR genotype group A1b |

Table S2. *Ba* exclusivity panel, with strain numbers taken from the AOAC exclusivity panel (SMPR 2010.003)<sup>17</sup>

| <i>Number</i> | <i>Species</i>          | <i>Strain</i>                       | <i>Characteristics</i>       | <i>Source</i> |
|---------------|-------------------------|-------------------------------------|------------------------------|---------------|
| BANN1         | <i>B. cereus</i>        | S2-8                                | pXO1-, pXO2-                 | LANL          |
| BANN2         | <i>B. cereus</i>        | 3A                                  | pXO1-, pXO2-                 | CRP           |
| BANN3         | <i>B. thuringiensis</i> | HD1011                              | pXO1-, pXO2-                 | LANL          |
| BANN4         | <i>B. thuringiensis</i> | 97-27                               | pXO1-, pXO2-                 | BEI           |
| BANN5         | <i>B. thuringiensis</i> | HD682                               | pXO1-, pXO2-                 | CRP           |
| BANN6         | <i>B. cereus</i>        | E33L                                | pXO1-, pXO2-                 | BEI           |
| BANN7         | <i>B. cereus</i>        | D17                                 | pXO1-, pXO2-                 | LANL          |
| BANN8         | <i>B. thuringiensis</i> | HD571                               | pXO1-, pXO2-                 | LANL          |
| BANN9         | <i>B. thuringiensis</i> | Al Hakam                            | pXO1-, pXO2-                 | CRP           |
| BANN10        | <i>B. cereus</i>        | ATCC 4342                           | pXO1-, pXO2-                 | CRP           |
| BANN11        | <i>B. cereus</i>        | FM1                                 | pXO1-, pXO2-                 | LANL          |
| BANN12        | <i>B. cereus</i>        | G9241                               | pBCXO1+ <sup>a</sup> , pXO2- | BEI           |
| BANN15        | <i>B. thuringiensis</i> | subsp. <i>Israelensis</i> , HD 1002 | pXO1-, pXO2-                 | LANL          |
| BANN16        | <i>B. thuringiensis</i> | subsp. <i>Kurstaki</i> , HD 1       | pXO1-, pXO2-                 | LANL          |
| BANN17        | <i>B. thuringiensis</i> | subsp. <i>Morrisoni</i> , HD 600    | pXO1-, pXO2-                 | LANL          |
| BANN18        | <i>B. coagulans</i>     | ATCC 7050                           | pXO1-, pXO2-                 | ATCC          |
| BANN19        | <i>B. mycoides</i>      | ATCC 6462                           | pXO1-, pXO2-                 | ATCC          |
| BANN20        | <i>B. megaterium</i>    | ATCC 14581                          | pXO1-, pXO2-                 | ATCC          |

<sup>a</sup>Contains a plasmid homologous to the pXO1 plasmid found in *Ba*.

Table S3. Commonly encountered suspicious powders tested with and without *Ba* Ames spores

| <i>Powder Type</i>             | <i>Powder Brand</i>                    | <i>Powder Type</i>              | <i>Powder Brand</i>       |
|--------------------------------|----------------------------------------|---------------------------------|---------------------------|
| Brewer's yeast powder          | Swanson Premium                        | Toothpaste powder with fluoride | The Country Gent          |
| Dipel dust                     | Green Light                            | Baking powder (aluminum free)   | Rumford                   |
| Milk powder                    | Peak                                   | Antacid (calcium carbonate)     | TUMS Ultrastrength 1000   |
| Infant formula                 | Enfamil Gentlease                      | Baking soda                     | Arm & Hammer              |
| White flour                    | Bob's Red Mill Organic                 | Epsom salt                      | Target                    |
| Coffee creamer (nondairy)      | Coffeemate Original                    | Gym chalk (magnesium carbonate) | No brand name             |
| Instant pectin                 | Real Fruit Pectin                      | Borax                           | 20 Mule Team              |
| Acetaminophen                  | Simply Right Healthcare Extra Strength | Talc                            | Pinaud Clubman            |
| Powdered sugar                 | Domino                                 | Road dust                       | ISO 12101-1, A1 Ultrafine |
| Cornstarch                     | Argo                                   | Kaolin                          | Making Cosmetics          |
| Polyethylene glycol 3350 (PEG) | MiraLAX                                | Popcorn salt                    | Diamond Crystal           |

Table S4. Limited testing of pure ricin and crude ricin preparations using *Ricinus communis* DNA assays for each PCR system. Data are reported as number of positive results/total tests performed.

| Sample                                                   | FilmArray®<br>BioThreat Panel | RAZOR® EX Ten™<br>Target Screen | T-COR 4™<br>Ricin assay | POCKIT™<br>Ricin assay |
|----------------------------------------------------------|-------------------------------|---------------------------------|-------------------------|------------------------|
| Pure ricin (0.1 µg/mL)                                   | 0/3                           | 0/3                             | 0/3                     | 0/3                    |
| Castor seed acetone protein precipitate (AP) (0.1 mg/mL) | 3/3                           | 1/3                             | 5/5                     | 5/5                    |
| Castor seed acetone extract (AE) (0.1 mg/mL)             | 3/3                           | 2/2N                            | 3/6                     | 5/5                    |
| Crushed castor seeds (CM) (0.1 mg/mL)                    | 3/3                           | 3/3                             | 5/6                     | 5/5                    |

N=no results reported by the instrument for the third sample.

- (1) CM: Soak seed in NaOH, rinse in cold water, then air dry and peel the seed hull. Crush the peeled seeds with a mortar and pestle.
- (2) AE: Prepare crushed seeds as for CM, then cover with acetone in a flask, and stir for 72h. Filter through a double layer of filter paper, dry, and scrape the dried material into a vial.
- (3) AP: Prepare 5 grams of castor seeds as for CM but add 10 mL phosphate-buffered saline when grinding with a pestle. Centrifuge the resulting slurry at 10,000 x g for 20 min at 4°C, which results in 3 layers. Recover the middle (aqueous) layer. Add acetone to approximately 6 times the aqueous volume and freeze overnight. Centrifuge the next day at 10,000 x g for 20 min, decant the acetone, and air-dry the precipitate.

We tested each of the instruments 3 times with pure ricin and 3 to 6 times with the 3 crude castor seed preparations (CM, AE, and AP). Pure ricin was tested at 0.1 µg/mL. The castor seed preparations were tested at 0.1 mg/mL. Results are shown in Table S4.

#### Ricin Assays: Pure Toxin and Crude Preparations

None of the instruments detected the pure ricin preparation, which was expected since ricin is a protein toxin and the “ricin” PCR assays are designed to detect *R. communis* DNA.

Both the FilmArray® and the POCKIT™ returned positive results in all replicates with the 3 different castor seed preparations, demonstrating that all 3 preparations contained *R. communis* DNA. The RAZOR® EX and the T-COR 4™ returned some false-negative results, and 1 of the RAZOR assays did not go to completion.

Crude ricin preparation instructions, particularly the CM and AE methods, can be readily found in the so-called “anarchist literature” (eg, refs 5-8). Therefore, it is important that first responders be able to identify the presence of ricin in such preparations. Although PCR, which detects specific DNA sequences (here, DNA from the *R. communis* plant), is not a direct test for the presence of the protein ricin, these results demonstrate that PCR can be used to detect crude ricin preparations.

#### REFERENCES

1. AOAC SMPR 2010.003: Standard method performance requirements for polymerase chain reaction (PCR) methods for detection of *Bacillus anthracis* in aerosol collection filters and/or liquids. *J AOAC Int* 2011;94(4):1347-1351.
2. AOAC SMPR 2010.004: Standard method performance requirements for immunological-based handheld assays (HHAs) for detection of *Bacillus anthracis* spores in visible powders. *J AOAC Int* 2011;94(4):1352-1355.
3. Weiss EA. *Castor. Oilseed Crops. Tropical Agriculture Series*. London and New York: Longman; 1983.
4. Wunschel DS, Melville AM, Ehrhardt CJ, et al. Integration of gas chromatography mass spectrometry methods for differentiating ricin preparation methods. *Analyst* 2012;137(9): 2077-2085.
5. Harber D. *Assorted Nasties*. El Dorado, AR: Desert Publications; 1993.
6. Saxon K. *The Poor Man's James Bond*. El Dorado, AR: Desert Publications; 1991.
7. Hutchkinson M. *The Poisoner's Handbook*. El Dorado, AR: Desert Publications; 2000.
8. Preisler S. *Silent Death*. 2d ed. Green Bay, WI: Festerling Publications; 1997.
